# Supplementary material for: Microstructural design of neodymium-doped lanthanum–magnesium hexaaluminate synthesized by aqueous sol–gel process
Source: Springer Nature journal article supplement (doi:10.1007/s10853-014-8593-5), 2014-09-15
Supplement: MOESM1 [file 3528164]

***Supplementary information***





Figure S1: XRD pattern of LaMgAl11O19 (x=0) sample calcined for 2h at (a) 1100°C, ( b) 1150°C and (c) 1200°C

XRD patterns of lanthanum magnesium hexaaluminate (LMHA, x=0) shows the hexaaluminate phase evolution. Lanthanum monoaluminate (LMA) and alpha alumina are the primary phase at 1100°C and LMHA phase appears at 1150°C. Trace amount of LMA phase is present at 1200°C. The formation temperature of LMHA agrees with the DTA results.


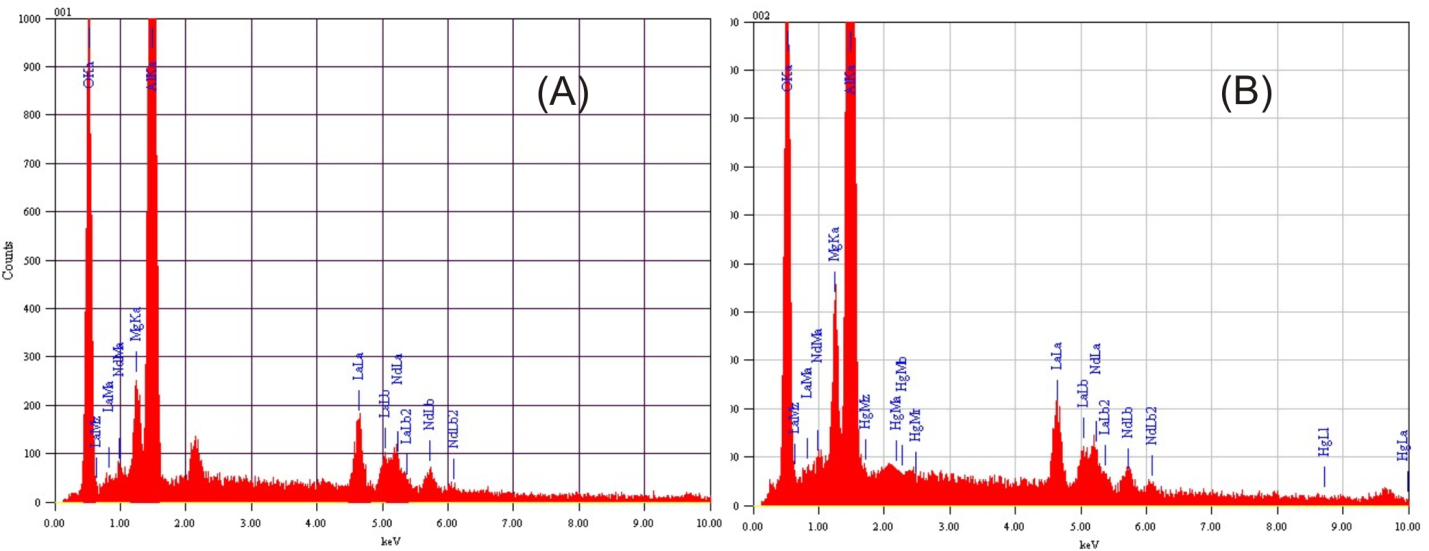


Figure S2: EDS results of La (1-x) NdxMgAl11O19 ceramics at x=0.4. (A) Elongated grain and (B) matrix

EDS results of La (1-x) NdxMgAl11O19 ceramics at x=0.4. Peaks corresponding to Al, Mg, La, Nd and O are shown in the figure S2. Compositions of elongated as well as matrix are worked out based on these results.
